# Supplementary material for: The Receptor Tyrosine Kinase RON and Its Isoforms as Therapeutic Targets in Ewing Sarcoma
Source: MDPI journal article supplement (doi:10.3390/cancers12040904), 2020-04-07
Supplement: s1 [file s1]

## Supplementary Figures S1-S5

To: Berning, P; *et al.*. The receptor tyrosine kinase RON and its isoforms as therapeutic targets in Ewing sarcoma

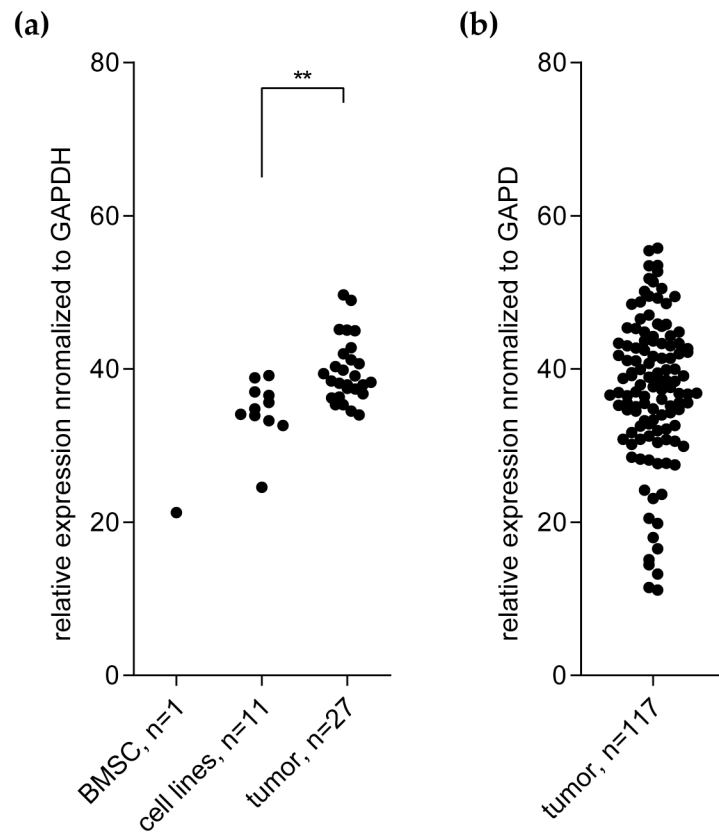

**Figure S1.** *RON* expression in additional Ewing sarcoma datasets. *RON* and *GAPDH* transcript expression were extracted from two datasets publicly available on the R2: genomics analysis and visualization platform (<http://r2.amc.nl>). (a) Relative *RON* transcript expression in human primary bone marrow stem cells (BMSC), Ewing sarcoma cell lines and tumors, as determined by analysis of microarray data; dataset as deposited by Tirode et al. [26]; (b) *RON* transcript expression in Ewing sarcomas, as determined by analysis of microarray data; dataset as deposited by Postel-Vinay et al. [27];

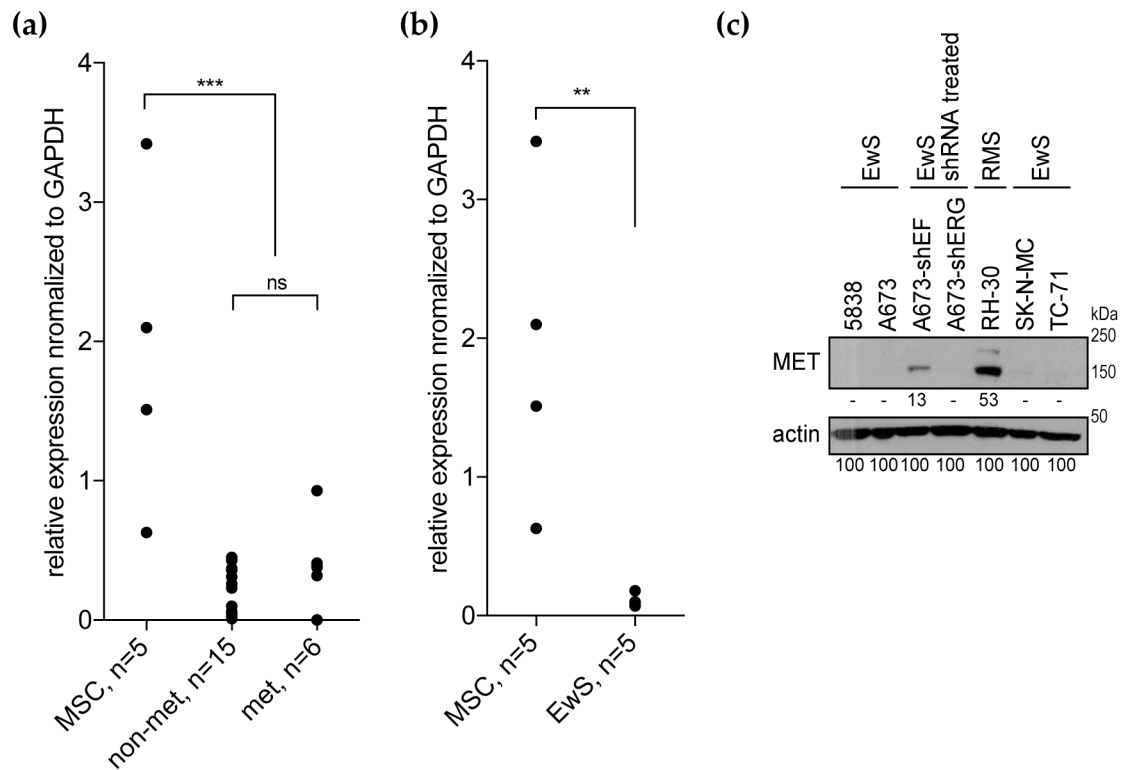

**Figure S2.** MET is minimally expressed and not active in Ewing sarcomas and cell lines. (a) Relative MET transcript expression in Ewing sarcoma primary tumors from patients with localized (non-met) or metastatic (met) disease in comparison to mesenchymal stem cell cultures (MSC), as determined by qPCR; (b) Respective MET expression in Ewing sarcoma cell lines (EwS) and MSC cultures; (c) MET protein is not expressed in Ewing sarcoma cell lines but is restricted to A673-shEF cells with shRNA-silencing of the Ewing sarcoma-specific EWS-FLI1 oncogene. A673-shERG cells containing shRNA directed against ERG, which is not expressed in A673, serve as control [52]. RH-30 rhabdomyosarcoma cells (RMS) serve as positive control for MET expression and phosphorylation. Cells were grown in standard tissue culture conditions. Arrow indicates double-band of phosphorylated MET. 10% gel; numbers indicate densitometry readings relative to respective actin loading control.

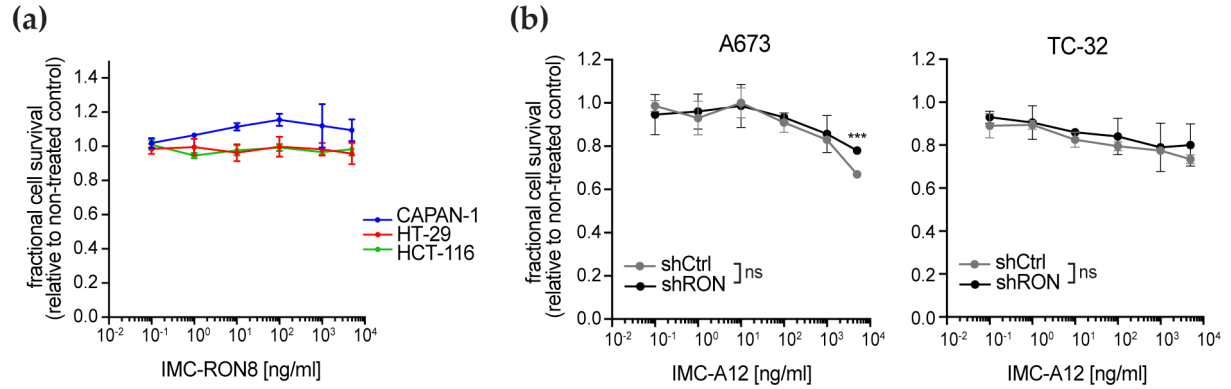

**Figure S3.** RON targeting does not affect cell viability *in vitro*. (a) The therapeutic anti-RON antibody IMC-RON8 does not significantly reduce monolayer cell viability of HT-29, HCT-116 and CAPAN-1 carcinoma cell lines. Cells were grown in standard conditions and treated as indicated. After 72 h, relative cell viability was measured by MTT assay. Graphs represent mean  $\pm$  SD of  $\geq 3$  independent experiments; (b) Co-targeting of RON and IGF1R by combined shRNA and IMC-A12 approach does not reveal increased effects compared to IMC-A12 alone. 9 days after transduction with shRNA targeting RON (shRON) or non-silencing control (shCtrl), cells were grown, treated and analyzed as in (a). Graphs represent the mean  $\pm$  SD of  $\geq 3$  independent transduction experiments.

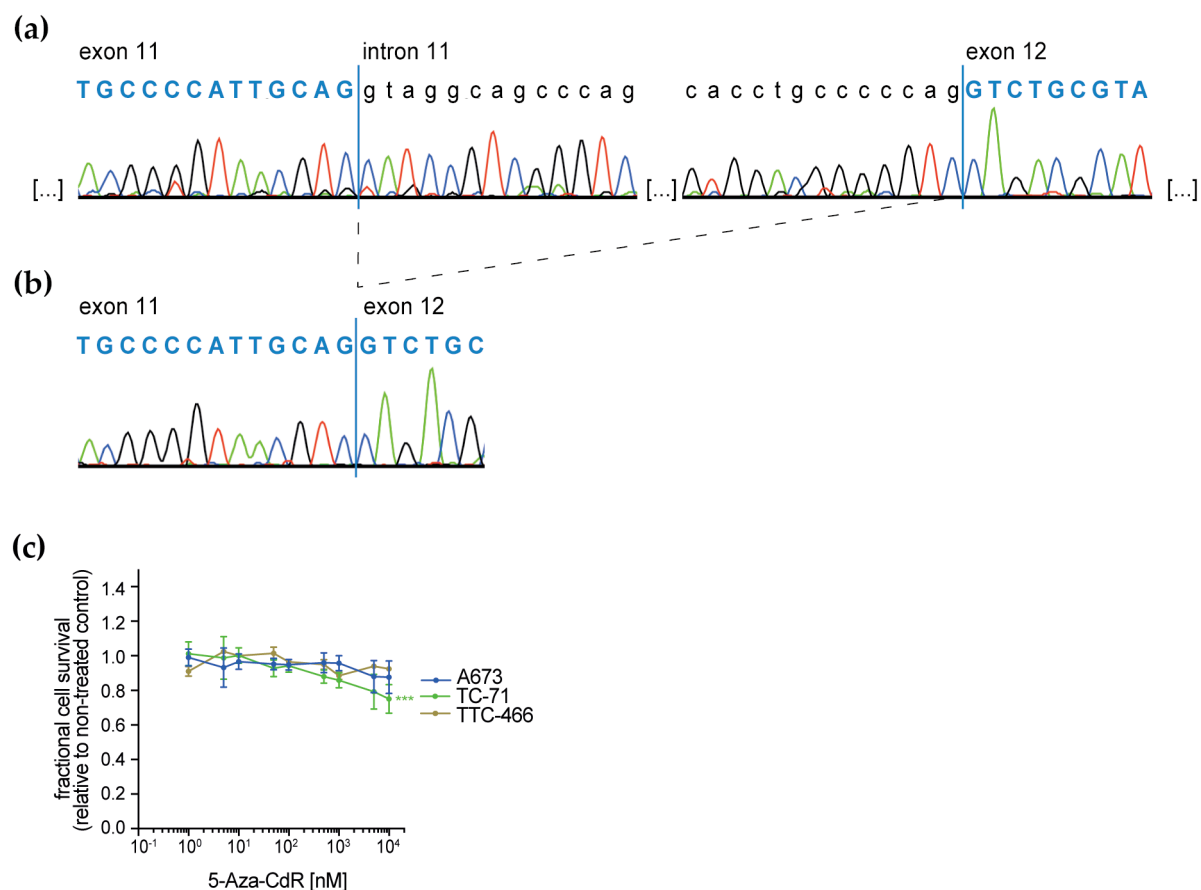

**Figure S4.** Ewing sarcomas express two sfRON variants. Upper and lower bands of sfRON PCR products from Figure 5b were sequenced, revealing higher-bp bands to contain intron 11 sequences (a), which were spliced in the lower-bp band (b). Representative sequences shown are from sample 9 of Figure 5b; (c) Dose response of Ewing sarcoma cell lines to 5-Aza-CdR treatment. Cells were grown in standard conditions and treated as indicated. After 72 h, relative cell viability was measured by MTT assay. Graphs represent mean  $\pm$  SD of  $\geq 3$  independent experiments.

Figure 1. (c)

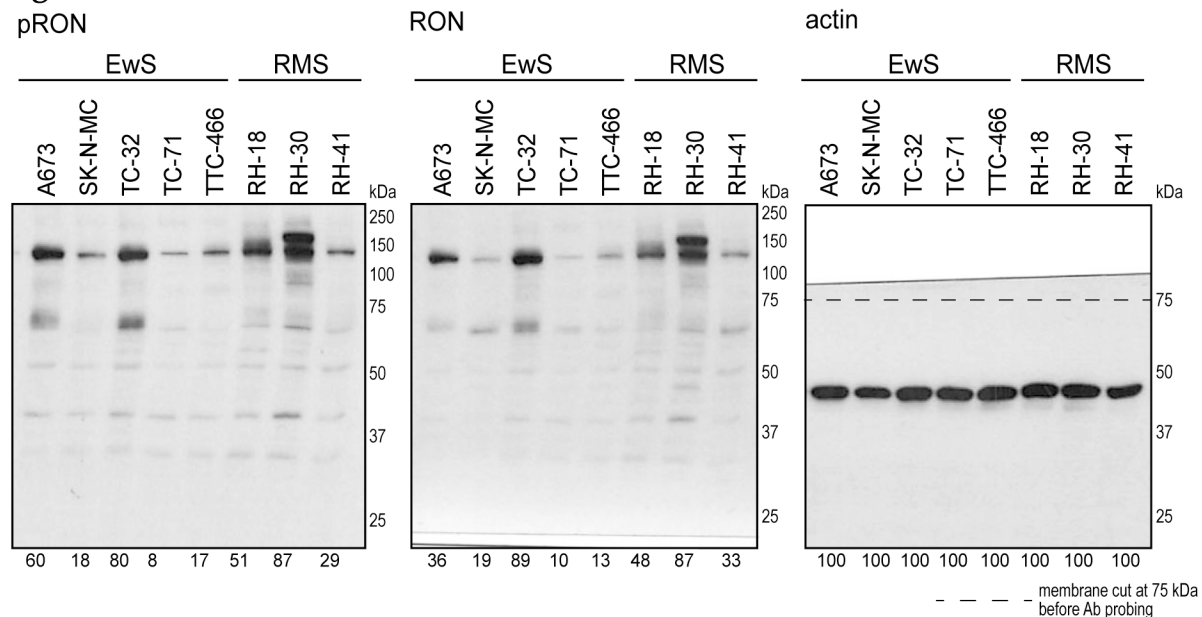

Figure 2. (a)

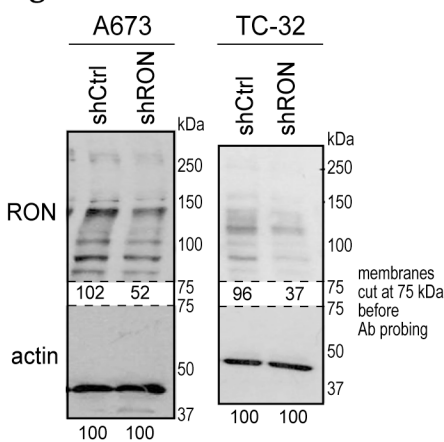

Figure 4. (c)

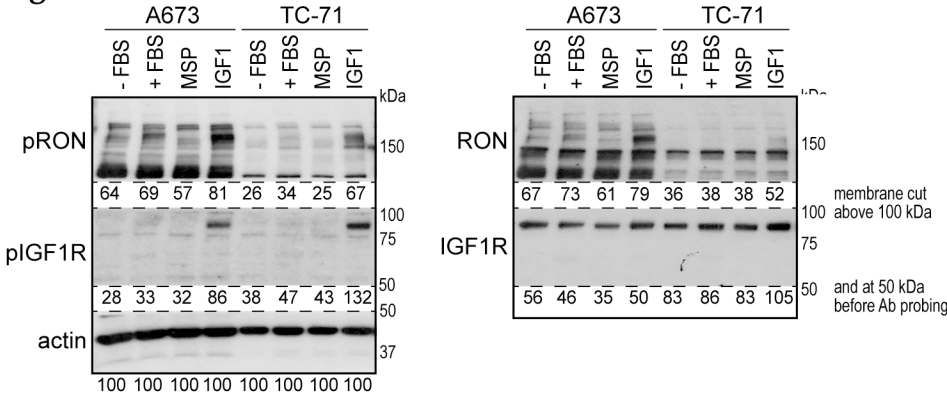

**Figure 5.(a)**

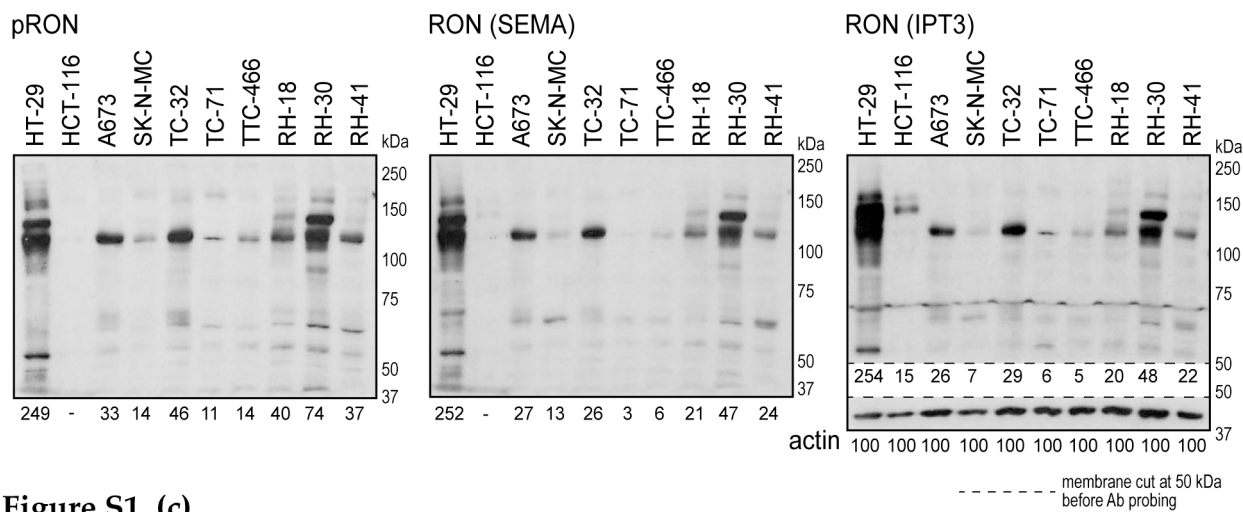

**Figure S1. (c)**

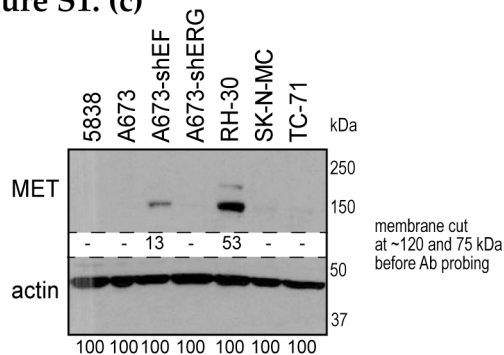

**Figure S5.** Uncropped immunoblots. In several experiments, nitrocellulose membranes were cut following protein transfer, based on Ponceau-S staining and protein markers, to facilitate comparative analysis of protein levels by parallel probing of primary antibodies. Numbers indicate densitometry readings of full lanes relative to respective actin loading control.
