# Supplementary material for: The Receptor Tyrosine Kinase RON and Its Isoforms as Therapeutic Targets in Ewing Sarcoma
Source: Cancers (Basel). 2020 Apr 7;12(4):904. doi: 10.3390/cancers12040904 (PMC7226494; doi:10.3390/cancers12040904)
Supplement: Supplementary file 1 [file cancers-12-00904-s001.zip]

Archive with 5 entries (4 files):
- Document S1.pdf
- __MACOSX/
- __MACOSX/._Document S1.pdf
- Supplementary Figures S1-5.pdf
- __MACOSX/._Supplementary Figures S1-5.pdf
